# Supplementary material for: miR-1271 inhibits ERα expression and confers letrozole resistance in breast cancer
Source: PubMed Central journal article supplement (PMC5739802; doi:10.18632/oncotarget.22359), 2017-11-09
Supplement: oncotarget-08-107134-s001.pdf [file oncotarget-08-107134-s001.pdf]

## miR-1271 inhibits ER $\alpha$ expression and confers letrozole resistance in breast cancer

### SUPPLEMENTARY MATERIALS

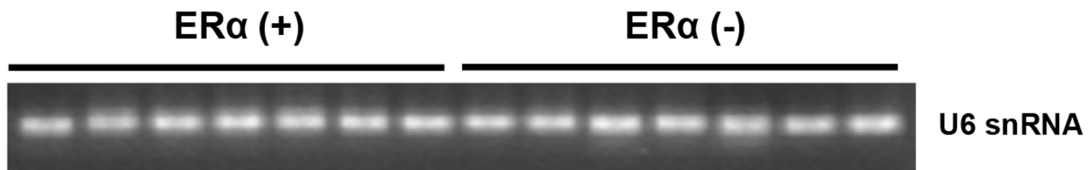

Supplementary Figure 1: Detection of U6 snRNA in 7 pairs of BCa specimens, as presented in Figure 1A, was achieved using RT-PCR.

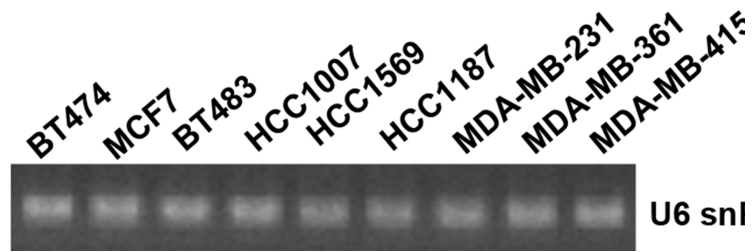

Supplementary Figure 2: Detection of U6 snRNA in different BCa cells, as presented in Figure 1D, was assessed using RT-PCR.

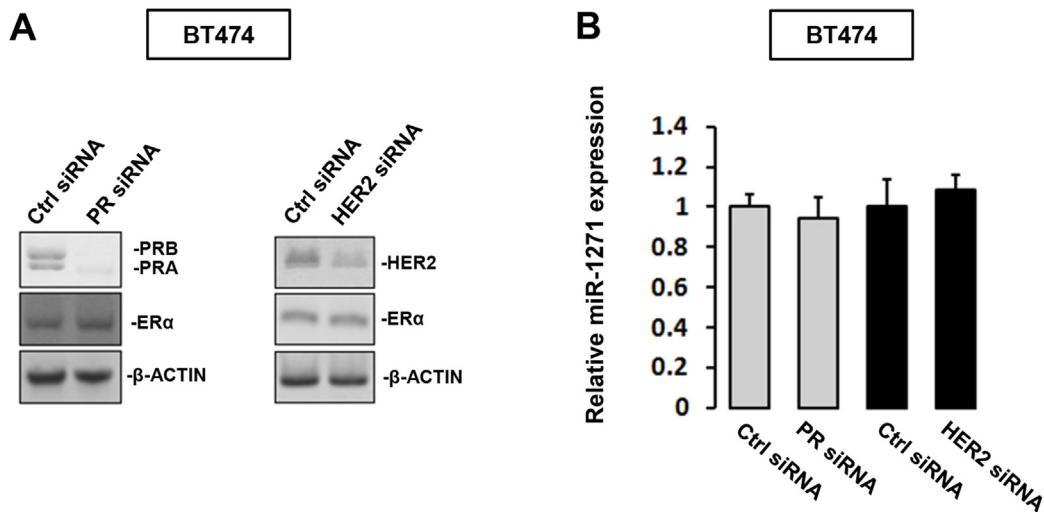

**Supplementary Figure 3: Effect of PR or HER2 status on miR-1271 expression levels.** (A) BT474 cells were transiently transfected with PR siRNA, HER2 siRNA and their corresponding negative controls (Ctrl siRNA), respectively. 48 h later, BT474 cells were harvested and subjected to immunoblotting analysis of ER $\alpha$  expression. (B) BT474 cells were transiently transfected with PR siRNA, HER2 siRNA and their corresponding negative controls (Ctrl siRNA), respectively. 48 h later, BT474 cells were harvested and subjected to RT-qPCR analysis of miR-1271 expression.

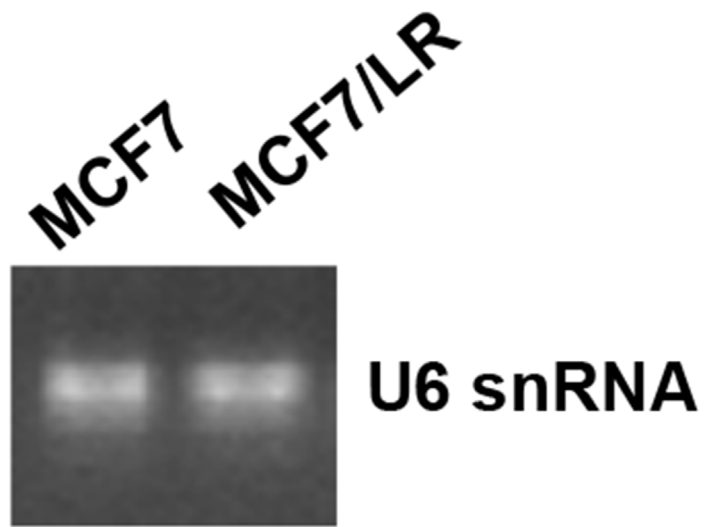

Supplementary Figure 4: Detection of U6 snRNA in different BCa cells, as presented in Figure 1F, was assessed using RT-PCR.

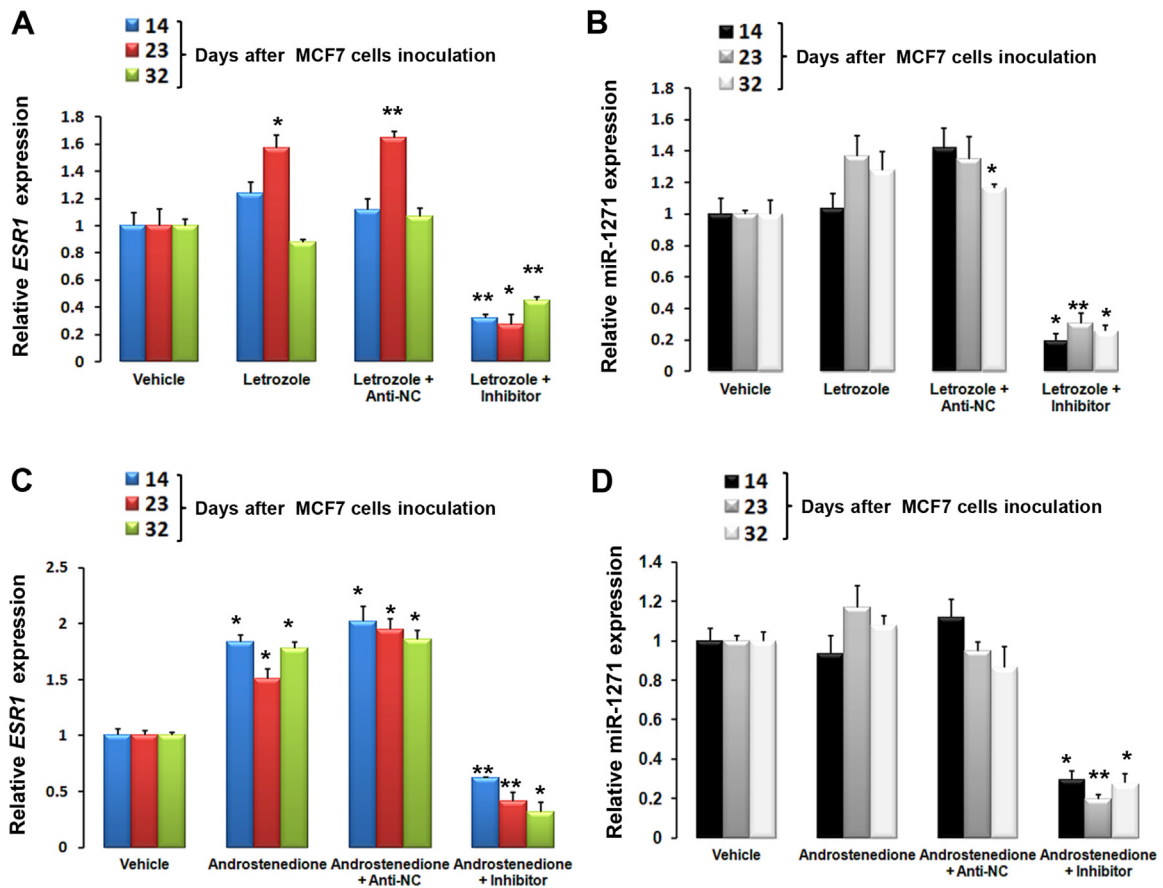

**Supplementary Figure 5: Effects of letrozole treatment or androstenedione treatment on ESR1 and miR-1271 expression in MCF7 tumor xenografts.** Letrozole or androstenedione-treated xenografts were collected at 14, 23 and 32 days after MCF7 cells inoculation, analyzed by RT-qPCR, and were compared with vehicle-treated xenografts collected at different timepoints (control). Letrozole treatment stimulated ESR1 expression at D 23, but exerted no effects at D 32. In contrast, androstenedione treatment constantly stimulated ESR1 expression at D 23 and D 32. More importantly, regardless of letrozole treatment or androstenedione treatment, we constantly observed a significant decrease in both ESR1 and miR-1271 expression levels in the MCF7 cells transfected with miR-1271 inhibitors. These results confirm that (1) by using miR-1271 inhibitors treatment, we could suppress miR-1271 expression levels for a relatively long period of time (about 35 days); (2) miR-1271 expression appeared to be positively correlated to ESR1 expression in BCa cells. \* $P < 0.05$  or \*\* $P < 0.01$  when compared to the values observed in vehicle-treated xenografts at different timepoints.

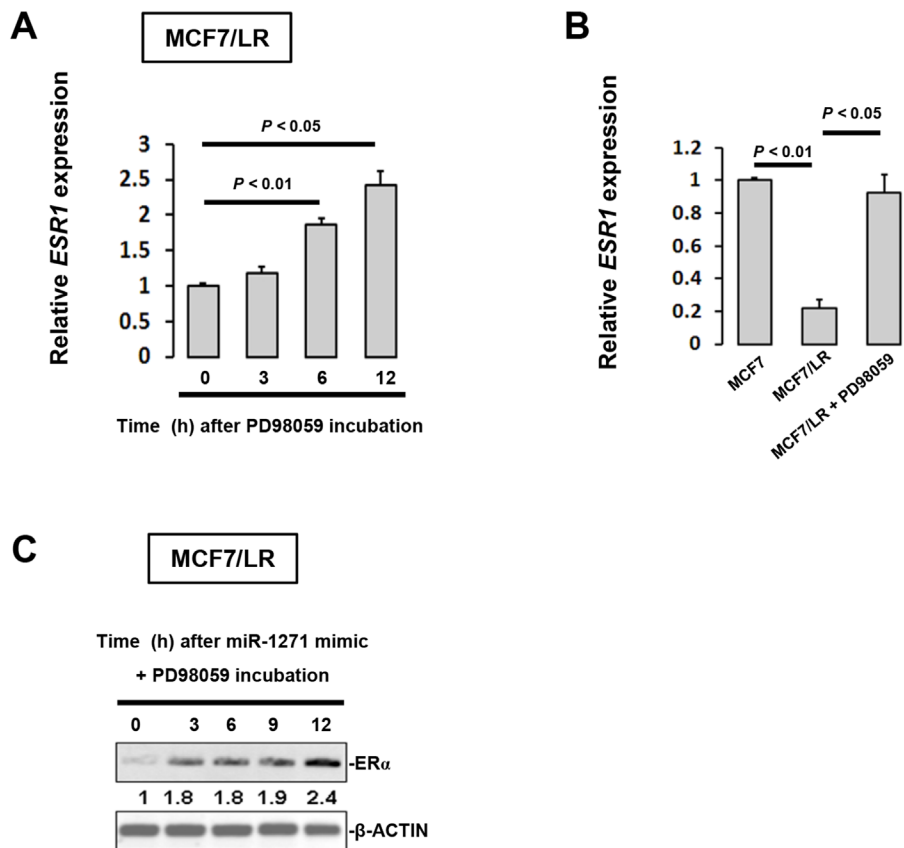

**Supplementary Figure 6: Effect of combined treatment with miR-1271 mimic and PD98059 on *ESR1* or *ER $\alpha$*  expression levels.** (A) MCF7/LR cells were incubated with the MAPK pathway inhibitor PD98059 (10  $\mu$ M) for various durations, followed by RT-qPCR analysis of *ESR1* expression. (B) MCF7 and MCF7/LR cells were incubated with PD98059 (10  $\mu$ M) for 6 h, followed by RT-qPCR analysis of *ESR1* expression. (C) MCF7/LR cells were incubated with miR-1271 mimic and PD98059 for different durations, followed by immunoblotting analysis of *ER $\alpha$*  expression.

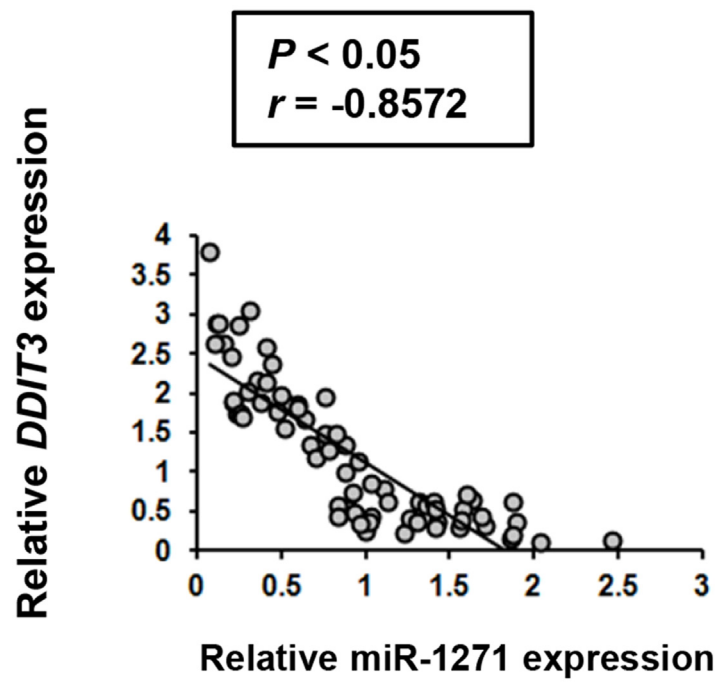

Supplementary Figure 7: RT-qPCR analysis along with *Pearson Chi-Square* test revealed that *DDIT3* mRNA level was inversely correlated with miR-1271 level in clinical BCa samples.

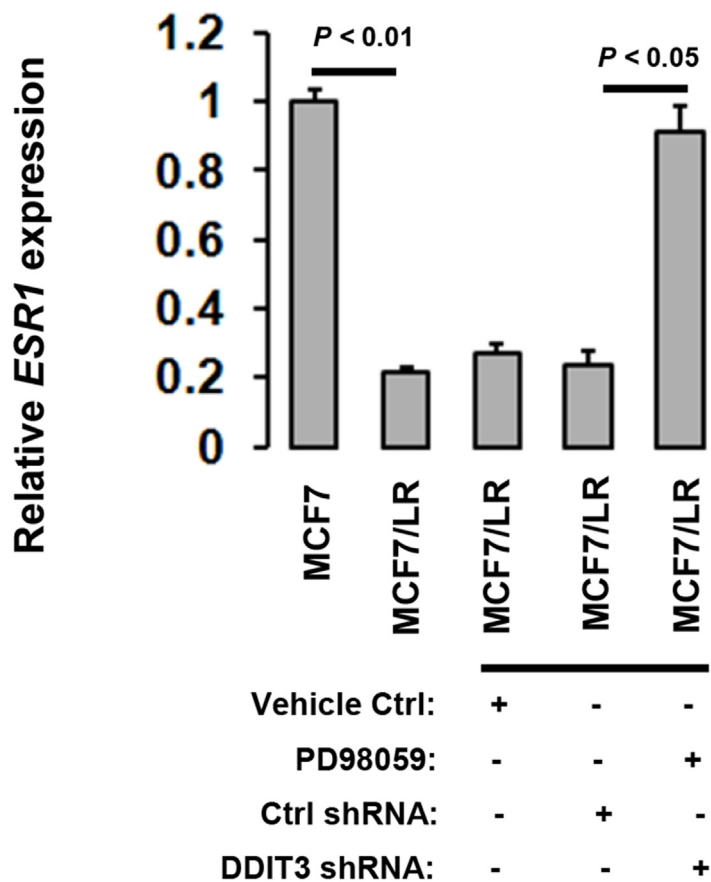

**Supplementary Figure 8: Effect of combined treatment with DDIT3 shRNA and PD98059 on *ESR1* expression levels in MCF7/LR cells.** MCF7/LR cells were transfected with DDIT3 shRNA or shRNA NC for 48 h, followed by incubation with PD98059 for another 6 h. Subsequently, the relative expression levels of *ESR1* mRNA in different experimental groups were determined using RT-qPCR.



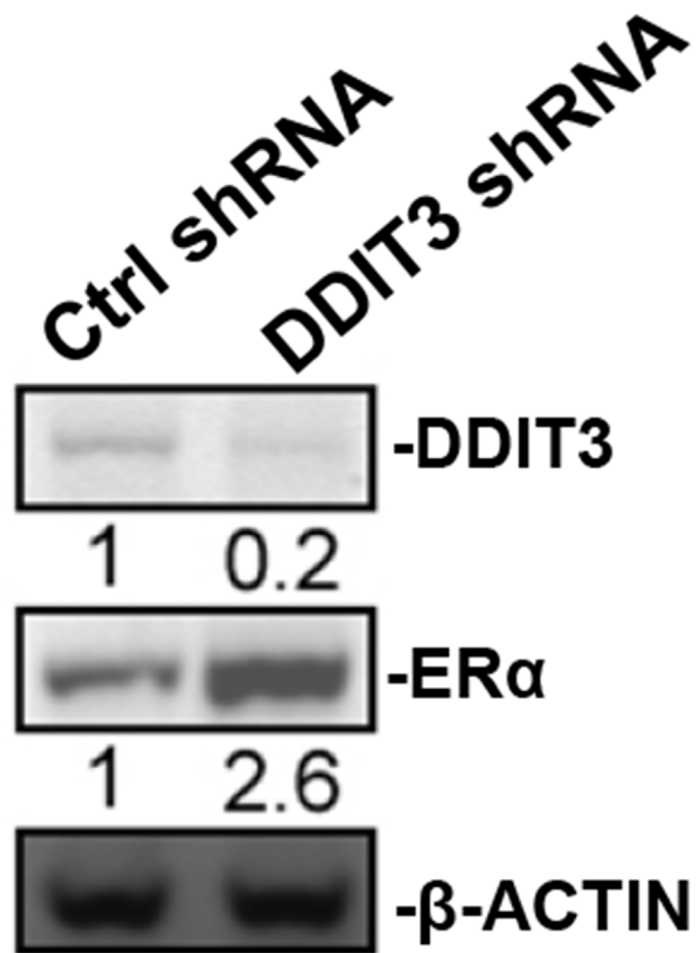

**Supplementary Figure 9: Establishment of MCF7 cells stably deficient of DDIT3 expression was confirmed using immunoblotting analysis.** Ablation of endogenous DDIT3 expression significantly stimulated ERα expression levels.

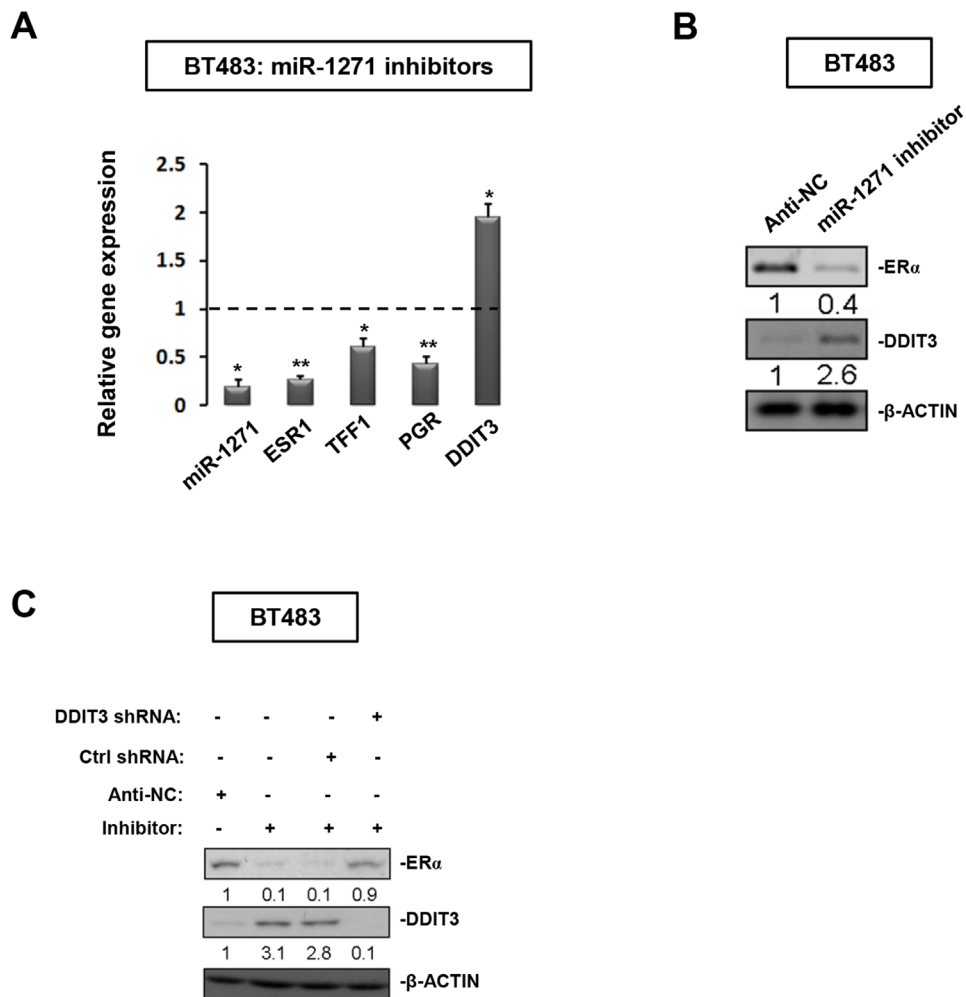

**Supplementary Figure 10: Verification of the effect of miR-1271/DDIT3/ERα cascade in another BCa luminal cell line (BT483 cells).** We transiently transfected BT483 cells with miR-1271 inhibitors or with Anti-NC as described above. 48 h later, cells were subjected to RT-qPCR (A) and immunoblotting analyses (B) to reveal the expression levels of ERα pathway and DDIT3. (C) Repression of DDIT3 expression level using shRNA treatment could effectively rescue the ERα expression levels even in the presence of miR-1271 inhibitors.

**Supplementary Table 1: Characteristics of the 70 patients with primary breast cancer from Department of Breast Surgery in Liaoning Cancer Hospital & Institute (Shenyang, China)**

|                                               | Number of patients (70) |
|-----------------------------------------------|-------------------------|
| <b>Age (years)</b>                            |                         |
| ≤ 50                                          | 31 (44.3%)              |
| > 50                                          | 39 (55.7%)              |
| <b>Macroscopic tumor size</b>                 |                         |
| ≤ 30 mm                                       | 25 (35.7%)              |
| > 30 mm                                       | 45 (64.3%)              |
| <b>Lymph node status</b>                      |                         |
| ≤ 3 involved                                  | 41 (58.6%)              |
| > 3 involved                                  | 29 (41.4%)              |
| <b>Scarff-Bloom-Richardson classification</b> |                         |
| 1                                             | 10 (14.3%)              |
| 2                                             | 17 (24.3%)              |
| 3                                             | 43 (61.4%)              |
| <b>Estrogen Receptor status</b>               |                         |
| Positive                                      | 43 (61.4%)              |
| Negative                                      | 27 (38.6%)              |
| <b>Progesterone Receptor status</b>           |                         |
| Positive                                      | 37 (52.9%)              |
| Negative                                      | 33 (47.1%)              |
| <b>HER2 status</b>                            |                         |
| Positive                                      | 26 (37.1%)              |
| Negative                                      | 44 (62.9%)              |

Supplementary Table 2: The primer sequences used in the current study

| Targets      | GenBank access<br>NO. or references | Primer sequence                                                   | Product<br>size | Annealing<br>Temperature | Concentration |        | Cycle |
|--------------|-------------------------------------|-------------------------------------------------------------------|-----------------|--------------------------|---------------|--------|-------|
|              |                                     |                                                                   |                 |                          | cDNA          | Primer |       |
| miR-1271     | Yang WM, <i>et al.</i> 2016         | F: TTGGCACCTAGCAAGCACTCA<br>R: miScript universal primer (Qiagen) | 90              | 55                       | 2 ng/μl       | 0.5 μM | 40    |
| U6           |                                     | F: CTCGCTTCGGCAGCACA<br>R: AACGCTTCACGAATTTGCGT                   | 94              |                          |               |        |       |
| <i>ESR1</i>  | NM_000125.3                         | F: GTCGCCTCTAACCTCGGG<br>R: GCTTTGGTGTGGAGGGTCAT                  | 131             | 60                       |               |        |       |
| <i>TFF1</i>  | NM_003225.2                         | F: ATACCATCGACGTCCCTCCA<br>R: TGGGACTAATCACCGTGCTG                | 106             | 58                       |               |        |       |
| <i>PGR</i>   | NM_0012024<br>74.3                  | F: TCCTCATAGGCCAGCTCTT<br>R: TTAGTGTGGTGGCAGCTGAG                 | 117             | 57                       |               |        |       |
| <i>DDIT3</i> | NM_0011950<br>53.1                  | F: GACCTGCAAGAGGTCCTGTC<br>R: CAGTCAGCCAAGCCAGAGAA                | 124             | 58                       |               |        |       |
| <i>18S</i>   | Li W, <i>et al.</i> 2011            | F: CTCGCCGCGCTCTACCTACCTA<br>R: ATGAGCCATTCGCAGTTTCACTGTA         | 120             | 60                       |               |        |       |
| P1           | NM_000125.3                         | F: CCAGGGCTTAAAGGTTAGGA<br>R: AAAATAGCACCCAAGTCTTCAG              | 91              | 60                       |               |        |       |
| P2           | NM_000125.3                         | F: GTCCTTCACATTTCTTTTCCTT<br>R: GTATCACGAGGGGAGTGAGCTTT           | 142             |                          |               |        |       |
| P3           | NM_000125.3                         | F: -CATGACGCTGTGCCAGGGAG<br>R: TGTAACCATGAATCCCTTGT               | 123             |                          |               |        |       |

1. Yang WM, Min KH, Lee W. MiR-1271 upregulated by saturated fatty acid palmitate provokes impaired insulin signaling by repressing INSR and IRS-1 expression in HepG2 cells. *Biochem Biophys Res Commun.* 2016; 478: 1786-1791.

2. Li W, Wu ZQ, Zhao J, Guo SJ, Li Z, Feng X, Ma L, Zhang JS, Liu XP, Zhang YQ. Transient protection from heat-stress induced apoptotic stimulation by metastasis-associated protein 1 in pachytene spermatocytes. *PLoS One.* 2011; 6: e26013.

**Supplementary Table 3: Sources of antibodies and the working dilutions that were used in the current study**

| <b>Antibody</b>                                | <b>Vendor</b>                                 | <b>Catalog no.</b> | <b>Dilutions</b>                   |
|------------------------------------------------|-----------------------------------------------|--------------------|------------------------------------|
| Rabbit anti-ER $\alpha$                        | CST (Shanghai, China)                         | #8644              | 1:1000                             |
| Rabbit anti-ERBB-2                             | CST (Shanghai, China)                         | #2165              | 1:1000                             |
| Rabbit anti-GRB2                               | CST (Shanghai, China)                         | #3972              | 1:1200                             |
| Rabbit anti-p-MAPK                             | CST (Shanghai, China)                         | #4370              | 1:1000                             |
| Rabbit anti-MAPK                               | Santa Cruz Biotechnology<br>(Shanghai, China) | sc-292838          | 1:2000                             |
| Rabbit anti-p-p90RSK                           | CST (Shanghai, China)                         | #9341              | 1:1500                             |
| Rabbit anti-p90RSK                             | GeneScript (Nanjing, China)                   | A00603-100         | 1:1000                             |
| Rabbit anti- $\beta$ -ACTIN                    | Thermo Fisher Scientific<br>(Shanghai, China) | PA1-46296          | 1:3000                             |
| Mouse anti-DDIT3                               | Abcam, (Hangzhou, China)                      | ab11419            | 1:500 (IB) 2 $\mu$ g/reaction (IP) |
| Goat anti-Rabbit IgG-HRP<br>secondary antibody | Abcam, (Hangzhou, China)                      | ab97200            | 1:10000                            |
| Goat anti-Mouse IgG-HRP<br>secondary antibody  | Santa Cruz Biotechnology<br>(Shanghai, China) | sc-2005            | 1:2500                             |
